# Supplementary material for: Undergraduate medical education in emergency medical care: A nationwide survey at German medical schools
Source: BMC Emerg Med. 2009 May 12;9:7. doi: 10.1186/1471-227X-9-7 (PMC2689168; doi:10.1186/1471-227X-9-7)
Supplement: Additional file 1 — Complete status-quo-questionnaire. Displayed is the complete questionnaire. [file 1471-227X-9-7-S1.pdf]

## Erhebung der Lehrsituation der notfallmedizinischen Ausbildung an Universitätskliniken in der Bundesrepublik Deutschland

- Elektronische Version unter [www.gesellschaft-medizinische-Ausbildung.de](http://www.gesellschaft-medizinische-Ausbildung.de)
- Bitte zurücksenden an [sbeckers@ukaachen.de](mailto:sbeckers@ukaachen.de)

### Allgemein

|                        |         |  |
|------------------------|---------|--|
| <b>Universität</b>     |         |  |
| <b>Ansprechpartner</b> | Name    |  |
|                        | e-mail  |  |
|                        | Telefon |  |

Das Studium ist folgendermaßen organisiert... ☐ Semester ☐ Studienjahr ☐ Trimester

Ist die Notfallmedizin in einem eigenen "Querschnittsbereich Notfallmedizin" organisiert? ☐ Ja ☐ Nein

Wie ist die Notfallmedizin ins Curriculum eingebunden? ☐ als Block-Kurs ☐ longitudinal

☐ anders (Bitte benennen!) \_\_\_\_\_

Wer leitet/organisiert die Lehre in der Notfallmedizin? \_\_\_\_\_

Welche Fächer sind beteiligt?

- |                                                |                                          |                                                        |                                    |
|------------------------------------------------|------------------------------------------|--------------------------------------------------------|------------------------------------|
| <input type="checkbox"/> Allgemeinchirurgie    | <input type="checkbox"/> Anästhesiologie | <input type="checkbox"/> Gynäkologie                   | <input type="checkbox"/> HNO       |
| <input type="checkbox"/> Innere Medizin        | <input type="checkbox"/> Neurochirurgie  | <input type="checkbox"/> Neurologie                    | <input type="checkbox"/> Pädiatrie |
| <input type="checkbox"/> Psychiatrie           | <input type="checkbox"/> Unfallchirurgie | <input type="checkbox"/> Urologie                      |                                    |
| <input type="checkbox"/> Verbrennungschirurgie |                                          | <input type="checkbox"/> Zahn-, Mund-, Kieferchirurgie |                                    |

☐ Andere (Bitte benennen!) \_\_\_\_\_

Ist ein detaillierter Lernzielkatalog für die Unterrichtsteile vorhanden? ☐ Ja ☐ Nein

Wenn Ja, wird er den Studierenden ausgehändigt? ☐ Ja ☐ Nein

Welcher Standard hinsichtlich der cardiopulmonalen Reanimation wird als Lehrmeinung vertreten?

- ☐ ERC ☐ AHA ☐ Empfehlungen BÄK ☐ keine Festlegung

☐ Andere (Bitte benennen!) \_\_\_\_\_

Gibt es eine eigene Internetpräsenz der notfallmedizinischen Lehre? ☐ Ja ☐ Nein

Wenn Ja, bitte benennen! \_\_\_\_\_

## Überblick Unterrichtsmethoden

|                             | Angeboten in Semester... | Geamt-Anzahl Semesterwochenstunden* | Gruppengröße | Dozenten je Gruppe | Anwesenheitspflicht                                          |
|-----------------------------|--------------------------|-------------------------------------|--------------|--------------------|--------------------------------------------------------------|
| Vorlesung                   |                          |                                     |              |                    | <input type="checkbox"/> Ja<br><input type="checkbox"/> Nein |
| Seminare                    |                          |                                     |              |                    | <input type="checkbox"/> Ja<br><input type="checkbox"/> Nein |
| Problem-orientiertes Lernen |                          |                                     |              |                    | <input type="checkbox"/> Ja<br><input type="checkbox"/> Nein |
| Praktikum                   |                          |                                     |              |                    | <input type="checkbox"/> Ja<br><input type="checkbox"/> Nein |
| Simulationstraining         |                          |                                     |              |                    | <input type="checkbox"/> Ja<br><input type="checkbox"/> Nein |
| Rettungsdienst-Praktikum    |                          |                                     |              |                    | <input type="checkbox"/> Ja<br><input type="checkbox"/> Nein |
|                             |                          |                                     |              |                    | <input type="checkbox"/> Ja<br><input type="checkbox"/> Nein |

\*alternativ können auch Unterrichtsstunden (tatsächlich abgehaltene, kumulative Unterrichtsstunden à 45 min) angegeben werden; bitte vermerken!

## Vorlesung

| Beteiligte Fächer | ggf. Themen/Schlagworte | Semesterwochenstunden* |
|-------------------|-------------------------|------------------------|
|                   |                         |                        |
|                   |                         |                        |
|                   |                         |                        |
|                   |                         |                        |

\*ggf. bei Bedarf bitte Zeilen ergänzen!

Alternativ können auch Unterrichtsstunden (tatsächlich abgehaltene, kumulative Unterrichtsstunden à 45 min) angegeben werden; bitte vermerken!

## Seminar

| Beteiligte Fächer | ggf. Themen/Schlagworte | Semesterwochenstunden* |
|-------------------|-------------------------|------------------------|
|                   |                         |                        |
|                   |                         |                        |
|                   |                         |                        |
|                   |                         |                        |

\*ggf. bei Bedarf bitte Zeilen ergänzen!

Alternativ können auch Unterrichtsstunden (tatsächlich abgehaltene, kumulative Unterrichtsstunden à 45 min) angegeben werden; bitte vermerken!

Gibt es Seminare, die interdisziplinär gehalten werden?

☐ Ja ☐ Nein

## Problem-orientiertes Lernen (POL)

| Beteiligte Fächer | ggf. Themen/Schlagworte | Semesterwochenstunden* |
|-------------------|-------------------------|------------------------|
|                   |                         |                        |
|                   |                         |                        |
|                   |                         |                        |
|                   |                         |                        |

*\*ggf. bei Bedarf bitte Zeilen ergänzen!*

*Alternativ können auch Unterrichtsstunden (tatsächlich abgehaltene, kumulative Unterrichtsstunden à 45 min) angegeben werden; bitte vermerken!*

Wie viele POL-Fälle werden bearbeitet? \_\_\_\_\_

Nach welchem Vorbild wird POL durchgeführt:

☐ Harvard    ☐ Maastricht    ☐ McMaster    ☐ Andere (Bitte benennen!) \_\_\_\_\_

## Praktikum (OHNE Simulation)

| Beteiligte Fächer | ggf. Themen/Schlagworte | Semesterwochenstunden* |
|-------------------|-------------------------|------------------------|
|                   |                         |                        |
|                   |                         |                        |
|                   |                         |                        |
|                   |                         |                        |

*\*ggf. bei Bedarf bitte Zeilen ergänzen!*

*Alternativ können auch Unterrichtsstunden (tatsächlich abgehaltene, kumulative Unterrichtsstunden à 45 min) angegeben werden; bitte vermerken!*

Gibt es Praktika, die interdisziplinär gehalten werden? ☐ Ja    ☐ Nein

Wenn Ja, welche Beteiligte! \_\_\_\_\_

## Simulation

| Beteiligte Fächer | ggf. Themen/Schlagworte | Semesterwochenstunden* |
|-------------------|-------------------------|------------------------|
|                   |                         |                        |
|                   |                         |                        |
|                   |                         |                        |
|                   |                         |                        |

*\*ggf. bei Bedarf bitte Zeilen ergänzen! Alternativ können auch Unterrichtsstunden (tatsächlich abgehaltene, kumulative Unterrichtsstunden à 45 min) angegeben werden; bitte vermerken!*

Gibt es Simulation, die interdisziplinär gehalten werden? ☐ Ja    ☐ Nein

Wenn Ja, welche Beteiligte! \_\_\_\_\_

Welche Simulatoren werden eingesetzt?

☐ Laerdal HeartSim 200    ☐ Laerdal HeartSim 4000    ☐ Laerdal ResusciSimulator  
☐ Ambu MiniMegaCodeTrainer    ☐ Ambu MegaCodeTrainer  
☐ Eagle    ☐ Laerdal SimMan    ☐ Laerdal SimBaby  
☐ Meti HPS    ☐ Meti ECS    ☐ Meti ECS (DGAI)

☐ Andere (Bitte benennen!) \_\_\_\_\_

## Ressourcen

|                             | Klinikchefs | Oberärzte | Fachärzte | Assistentzärzte | Pflegekräfte | Studentische Hilfskräfte |
|-----------------------------|-------------|-----------|-----------|-----------------|--------------|--------------------------|
| Vorlesung                   |             |           |           |                 |              |                          |
| Seminare                    |             |           |           |                 |              |                          |
| Problem-orientiertes Lernen |             |           |           |                 |              |                          |
| Praktikum                   |             |           |           |                 |              |                          |
| Simulationstraining         |             |           |           |                 |              |                          |
| Rettungsdienst-Praktikum    |             |           |           |                 |              |                          |
|                             |             |           |           |                 |              |                          |

\*Bitte ankreuzen, ggf. bei Bedarf bitte Zeilen ergänzen!

Wie wird Verbrauchsmaterial, studentische Hilfskräfte etc. finanziert?

☐ Abteilungsbudget    ☐ Fakultät    ☐ Studiendekanat    ☐ Drittmittel

Andere (Bitte benennen!): \_\_\_\_\_

Gibt es ein Anreiz-/Bonusprogramm für Lehrleistungen? ☐ Ja    ☐ Nein

Wenn Ja, welche und wie hoch dotiert: \_\_\_\_\_

Gibt es Preise/Auszeichnungen für Lehrprojekte? ☐ Ja    ☐ Nein

Wenn Ja, welche und wie hoch dotiert: \_\_\_\_\_

Sind Lehrleistungen Voraussetzung für die Habilitation? ☐ Ja    ☐ Nein

Wenn Ja, welche: \_\_\_\_\_

## Qualifikation der Instrukturen

Wie viele Dozenten haben welche Qualifikationen in (notfall)medizinischer Ausbildung?

|                          |                      |                          |                     |                          |                                      |
|--------------------------|----------------------|--------------------------|---------------------|--------------------------|--------------------------------------|
| <input type="checkbox"/> | ERC-BLS/AED-Provider | <input type="checkbox"/> | AHA-BLS-Provider    | <input type="checkbox"/> | Harvard Physicians Educator          |
| <input type="checkbox"/> | ERC-ALS-Provider     | <input type="checkbox"/> | AHA-ACLS-Instructor | <input type="checkbox"/> | Master of Medical Education (MME)    |
| <input type="checkbox"/> | ERC-ALS-Instructor   | <input type="checkbox"/> |                     | <input type="checkbox"/> | eigene Teach-the-Teacher-Zertifikate |
| <input type="checkbox"/> |                      | <input type="checkbox"/> |                     | Welche:                  |                                      |

Ist die Tätigkeit als Notarzt Voraussetzung für den Einsatz im Unterricht? ☐ Ja    ☐ Nein

## Ausbildung in der Praxis

Wenn eine praktische Ausbildung im Rettungsdienst stattfindet, auf welchem Rettungsmittel:

☐ KTW      ☐ RTW      ☐ NEF      ☐ NAW      ☐ RTH      ☐ ITH

Ist ein „Logbuch“ für diesen praktischen Anteil vorhanden? ☐ Ja    ☐ Nein

## Prüfung

Welche Prüfungsformen kommen in der notfallmedizinischen Lehre zum Einsatz?

|                             | Anzahl Fra-<br>gen | MCQ                      | Offene Fra-<br>gen       | MC und<br>offene Fragen  | IMPP-Fragen                                                  |
|-----------------------------|--------------------|--------------------------|--------------------------|--------------------------|--------------------------------------------------------------|
| <b>Schriftliche Prüfung</b> |                    | <input type="checkbox"/> | <input type="checkbox"/> | <input type="checkbox"/> | <input type="checkbox"/> Ja<br><input type="checkbox"/> Nein |

|                          | Anzahl Fra-<br>gen | Dauer | Anzahl der<br>Prüfer | Checkliste                                                   | IMPP-Fragen                                                  |
|--------------------------|--------------------|-------|----------------------|--------------------------------------------------------------|--------------------------------------------------------------|
| <b>Mündliche Prüfung</b> |                    |       |                      | <input type="checkbox"/> Ja<br><input type="checkbox"/> Nein | <input type="checkbox"/> Ja<br><input type="checkbox"/> Nein |

|                           | Anzahl Stationen | Dauer | Anzahl der Prüfer | Checkliste                                                   |
|---------------------------|------------------|-------|-------------------|--------------------------------------------------------------|
| <b>Praktische Prüfung</b> |                  |       |                   | <input type="checkbox"/> Ja<br><input type="checkbox"/> Nein |
| <b>OSCE</b>               |                  |       |                   | <input type="checkbox"/> Ja<br><input type="checkbox"/> Nein |

|                    |  |
|--------------------|--|
| <b>Andere *</b>    |  |
| <b>Mini-CEX</b>    |  |
| <b>OSLER</b>       |  |
| <b>Triple-Jump</b> |  |
|                    |  |

\* Bitte ggf. Anzahl der Fragen, Prüfer, Bewertungsmaßstäbe etc. eintragen!

## Evaluation

Wie werden die genannten Lehrveranstaltungen evaluiert:

☐ gar nicht      ☐ übers Internet      ☐ per SMS      ☐ mit einem Fragebogen

Der Inhalt und die Form der Evaluation ist vorgegeben von . . .

☐ der eigenen Klinik    ☐ der Fakultät    ☐ dem Studiendekanat    ☐ der Fachschaft

Die Evaluation wird ausgewertet von . . .

☐ der eigenen Klinik    ☐ der Fakultät    ☐ dem Studiendekanat    ☐ der Fachschaft

☐ extern (Bitte benennen!): \_\_\_\_\_

Werden die Ergebnisse der Evaluationen öffentlich gemacht (z.B. in Form einer Rangliste)?

☐ Ja                      ☐ Nein  
Wenn Ja, wo?      ☐ Per Aushang      ☐ Intranet              ☐ Internet

☐ Andere (Bitte benennen!): \_\_\_\_\_
